# Supplementary material
Source: Springer Nature journal article supplement (https://www.springermedizin.de/resource/supplementary/12889_2009_1717_MOESM3_ESM.pdf/9503810)

Types of ARV regimens among pregnant women who initiated any ARV

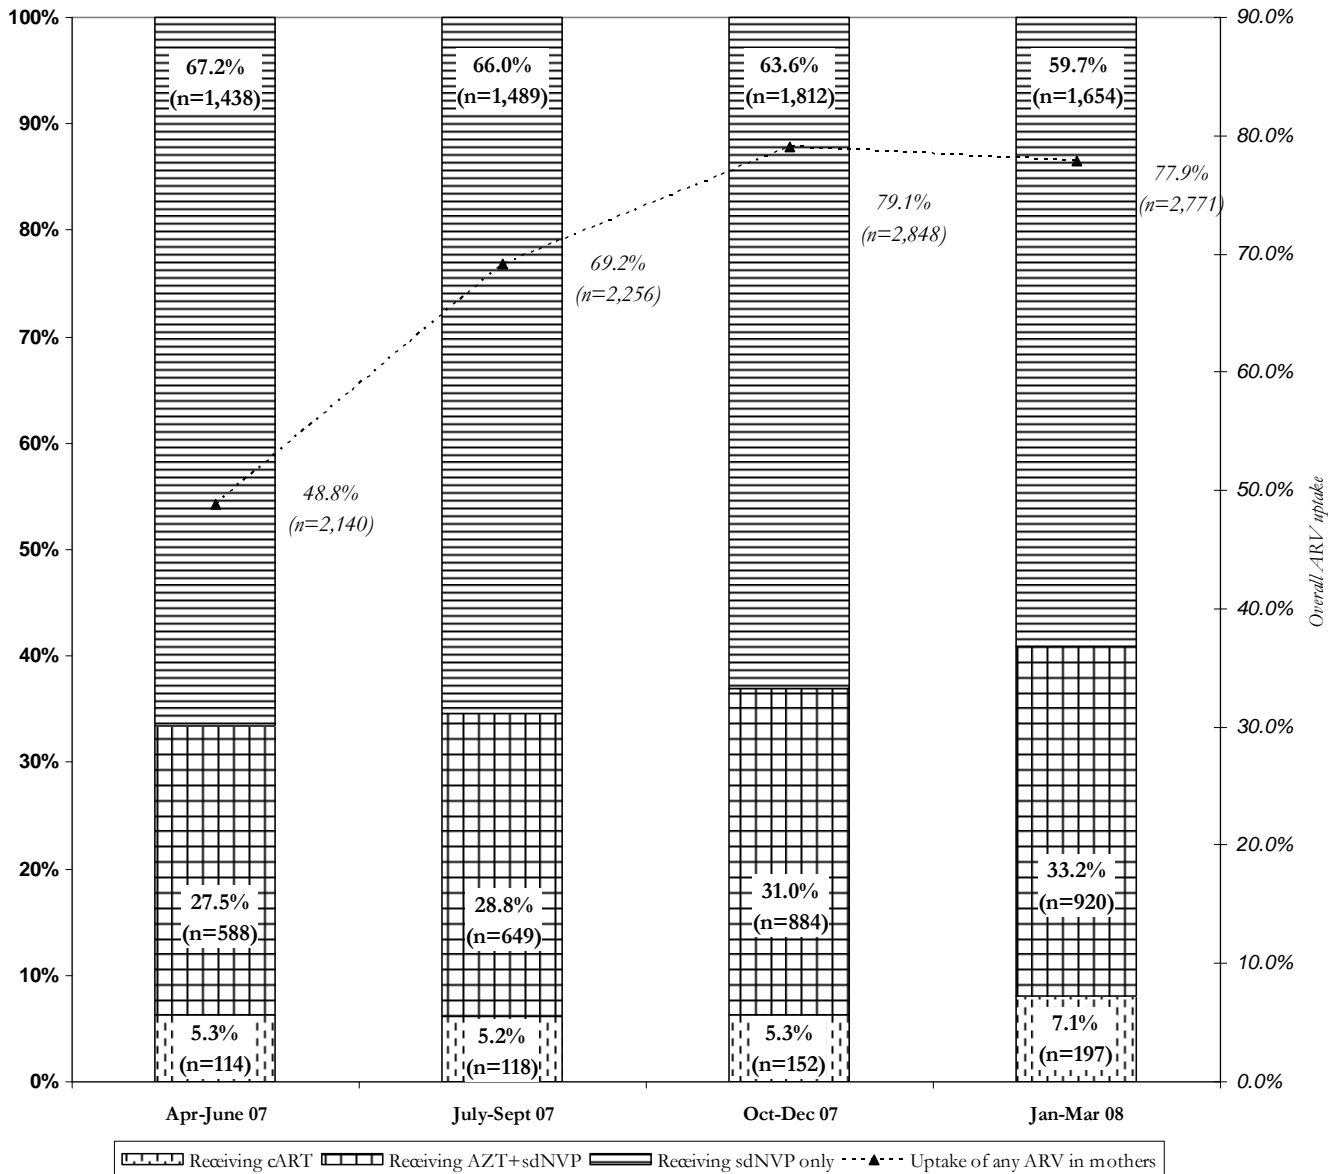

Supplement: MOESM3 [file 9503810]
